# Supplementary material for: HNRNPC stabilizes m6A-modified AC145207.5 to accelerate tumorigenesis in colorectal cancer by impeding the Nrf2/GPX4 axis-mediated ferroptosis
Source: Research Square preprint supplement (doi:10.21203/rs.3.rs-5676492/v1), 2024-12-23
Supplement: Supplementary file 2 [file 9905d69de0c33918202486be.docx]

**Supplementary information**

**
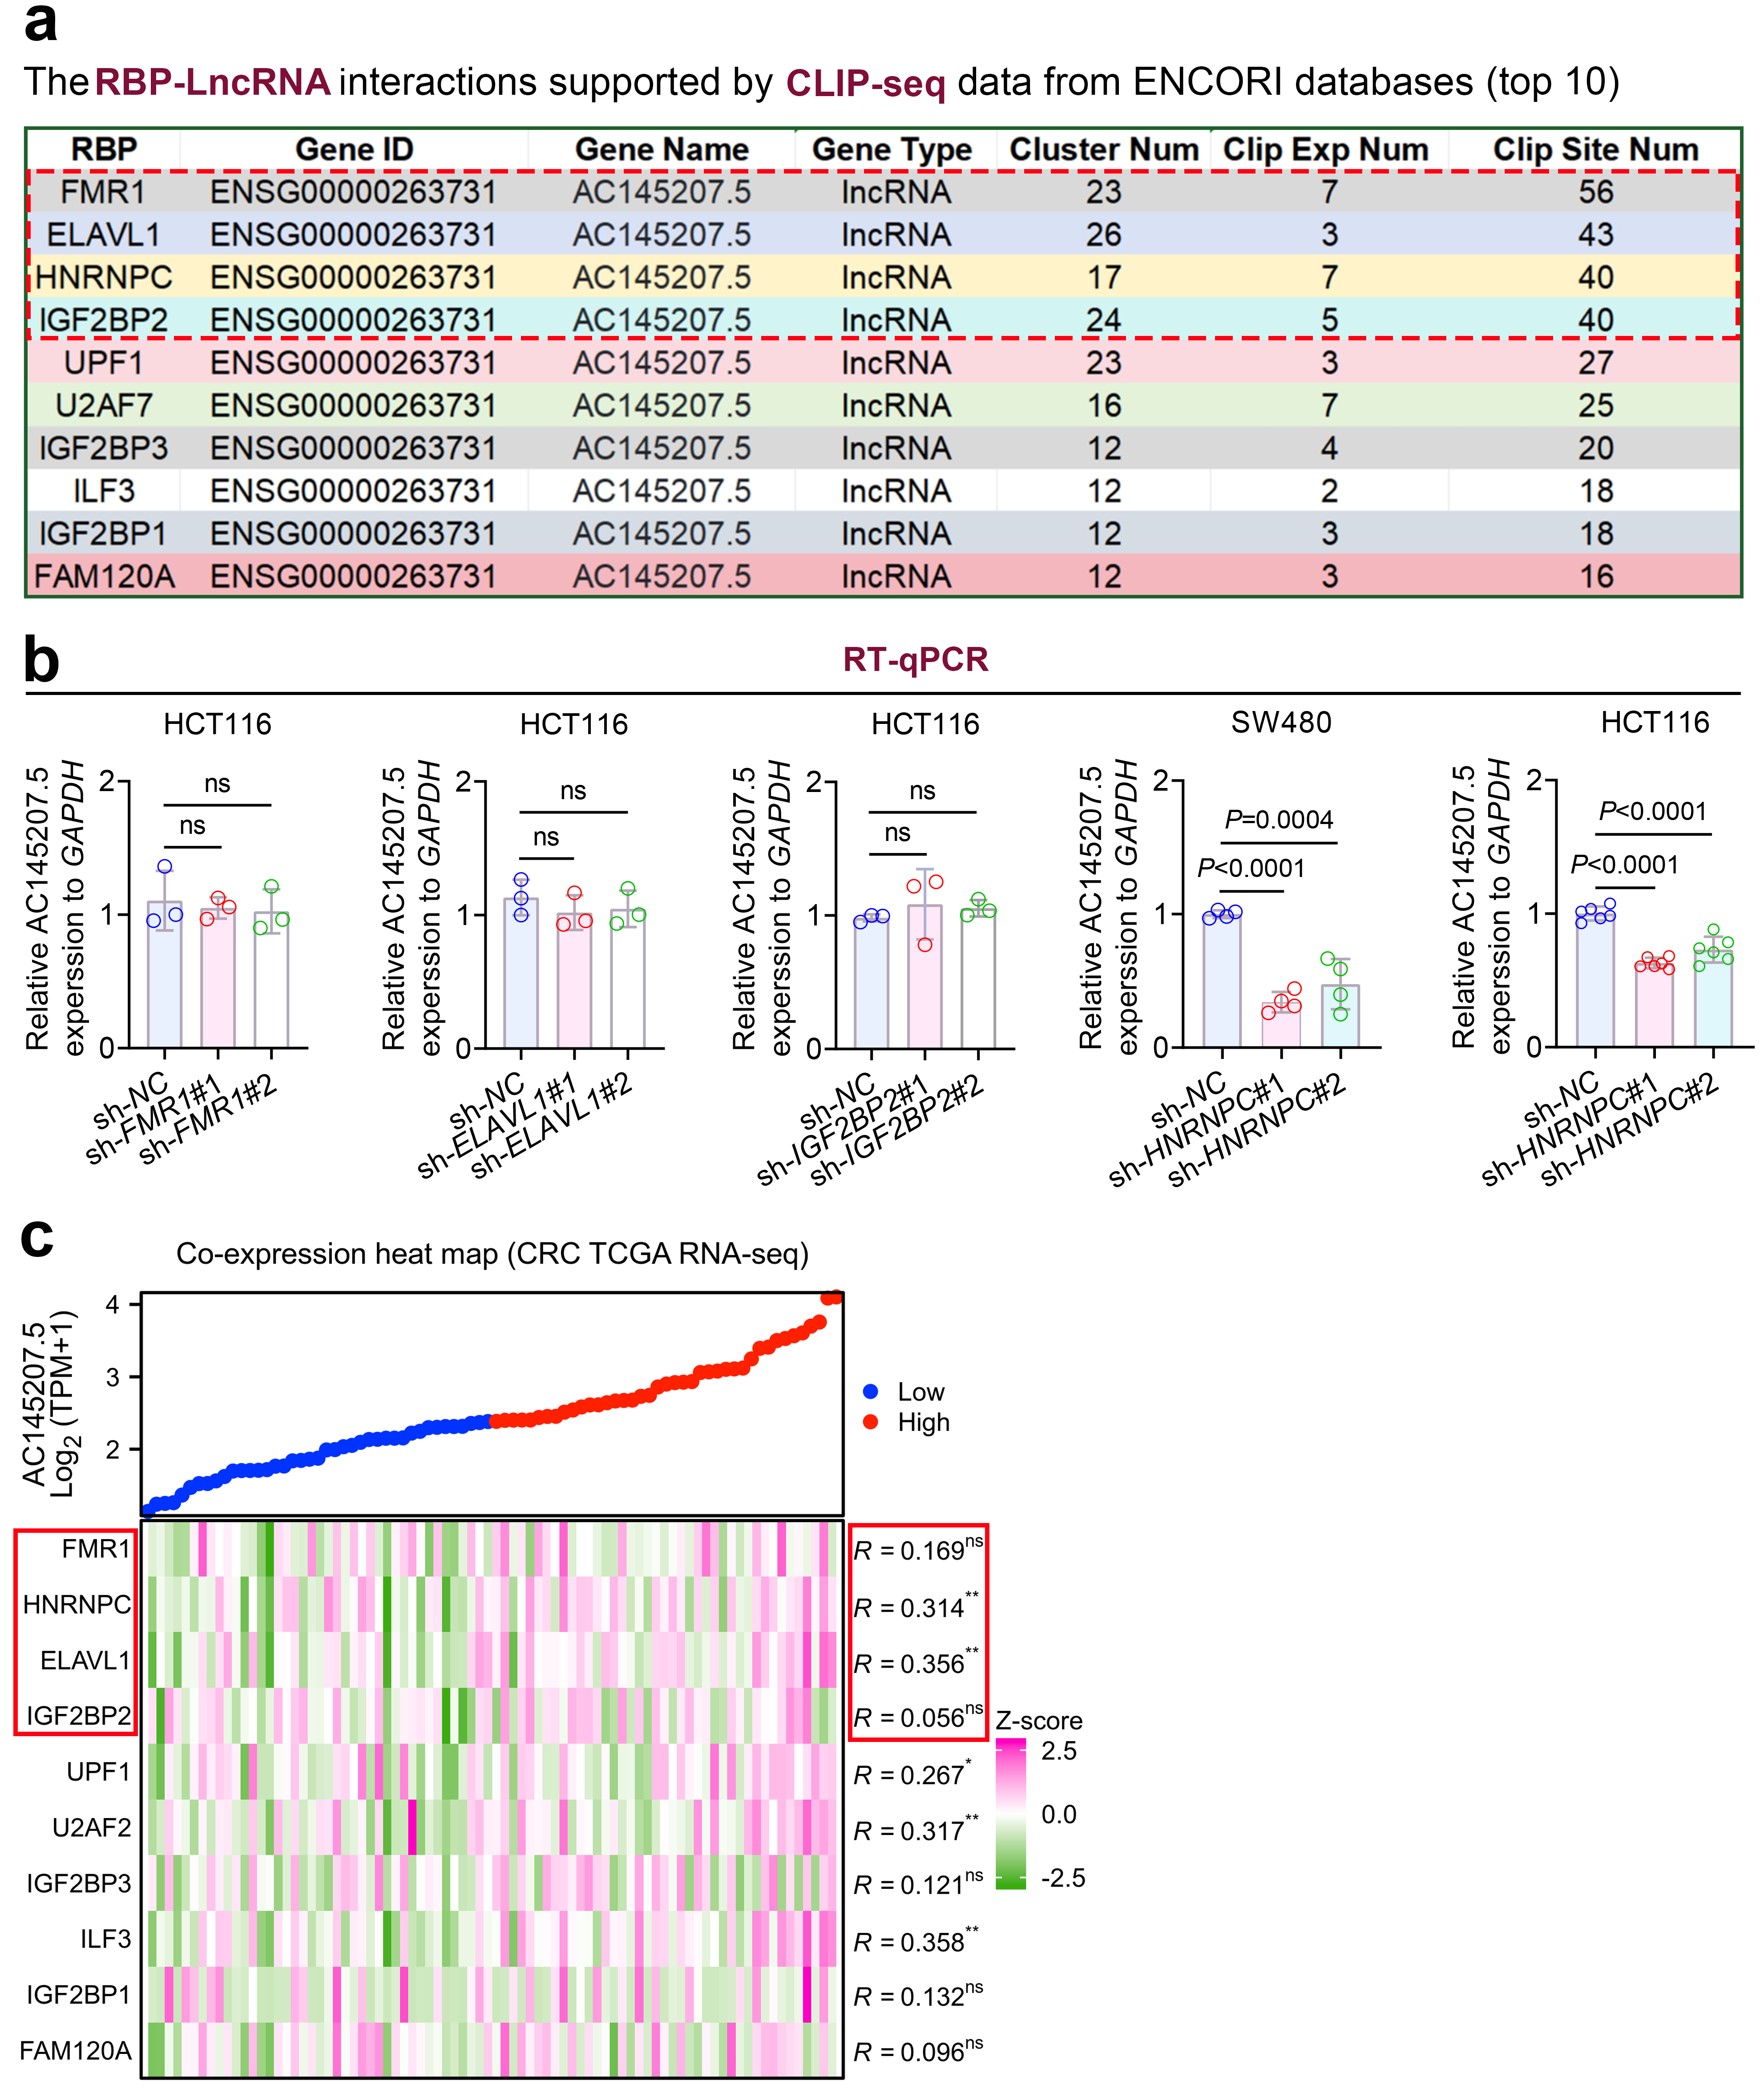
**

**Fig.S1 Screening of RNA-binding proteins interacting with AC145207.5, related to Fig.1.** (**a**) Identification of four RNA-binding proteins (FMR1, ELAVL1, HNRNPC, IGF2BP2) with the highest binding affinity for AC145207.5 through the ENCORI database. (**b**) The expression of *FMR1*, *ELAVL1*, *HNRNPC*, and *IGF2BP2* was individually knocked down in HCT116 cells and the expression level of AC145207.5 was subsequently quantified by RT-qPCR to evaluate the impact of each RNA-binding protein on AC145207.5 expression. Statistical analyses were performed using the One-way ANOVA-test and Student’s t-test. (**c**) Heat map representation illustrating the correlation between AC145207.5 and top 10 significantly RNA-binding proteins, derived from TCGA data.


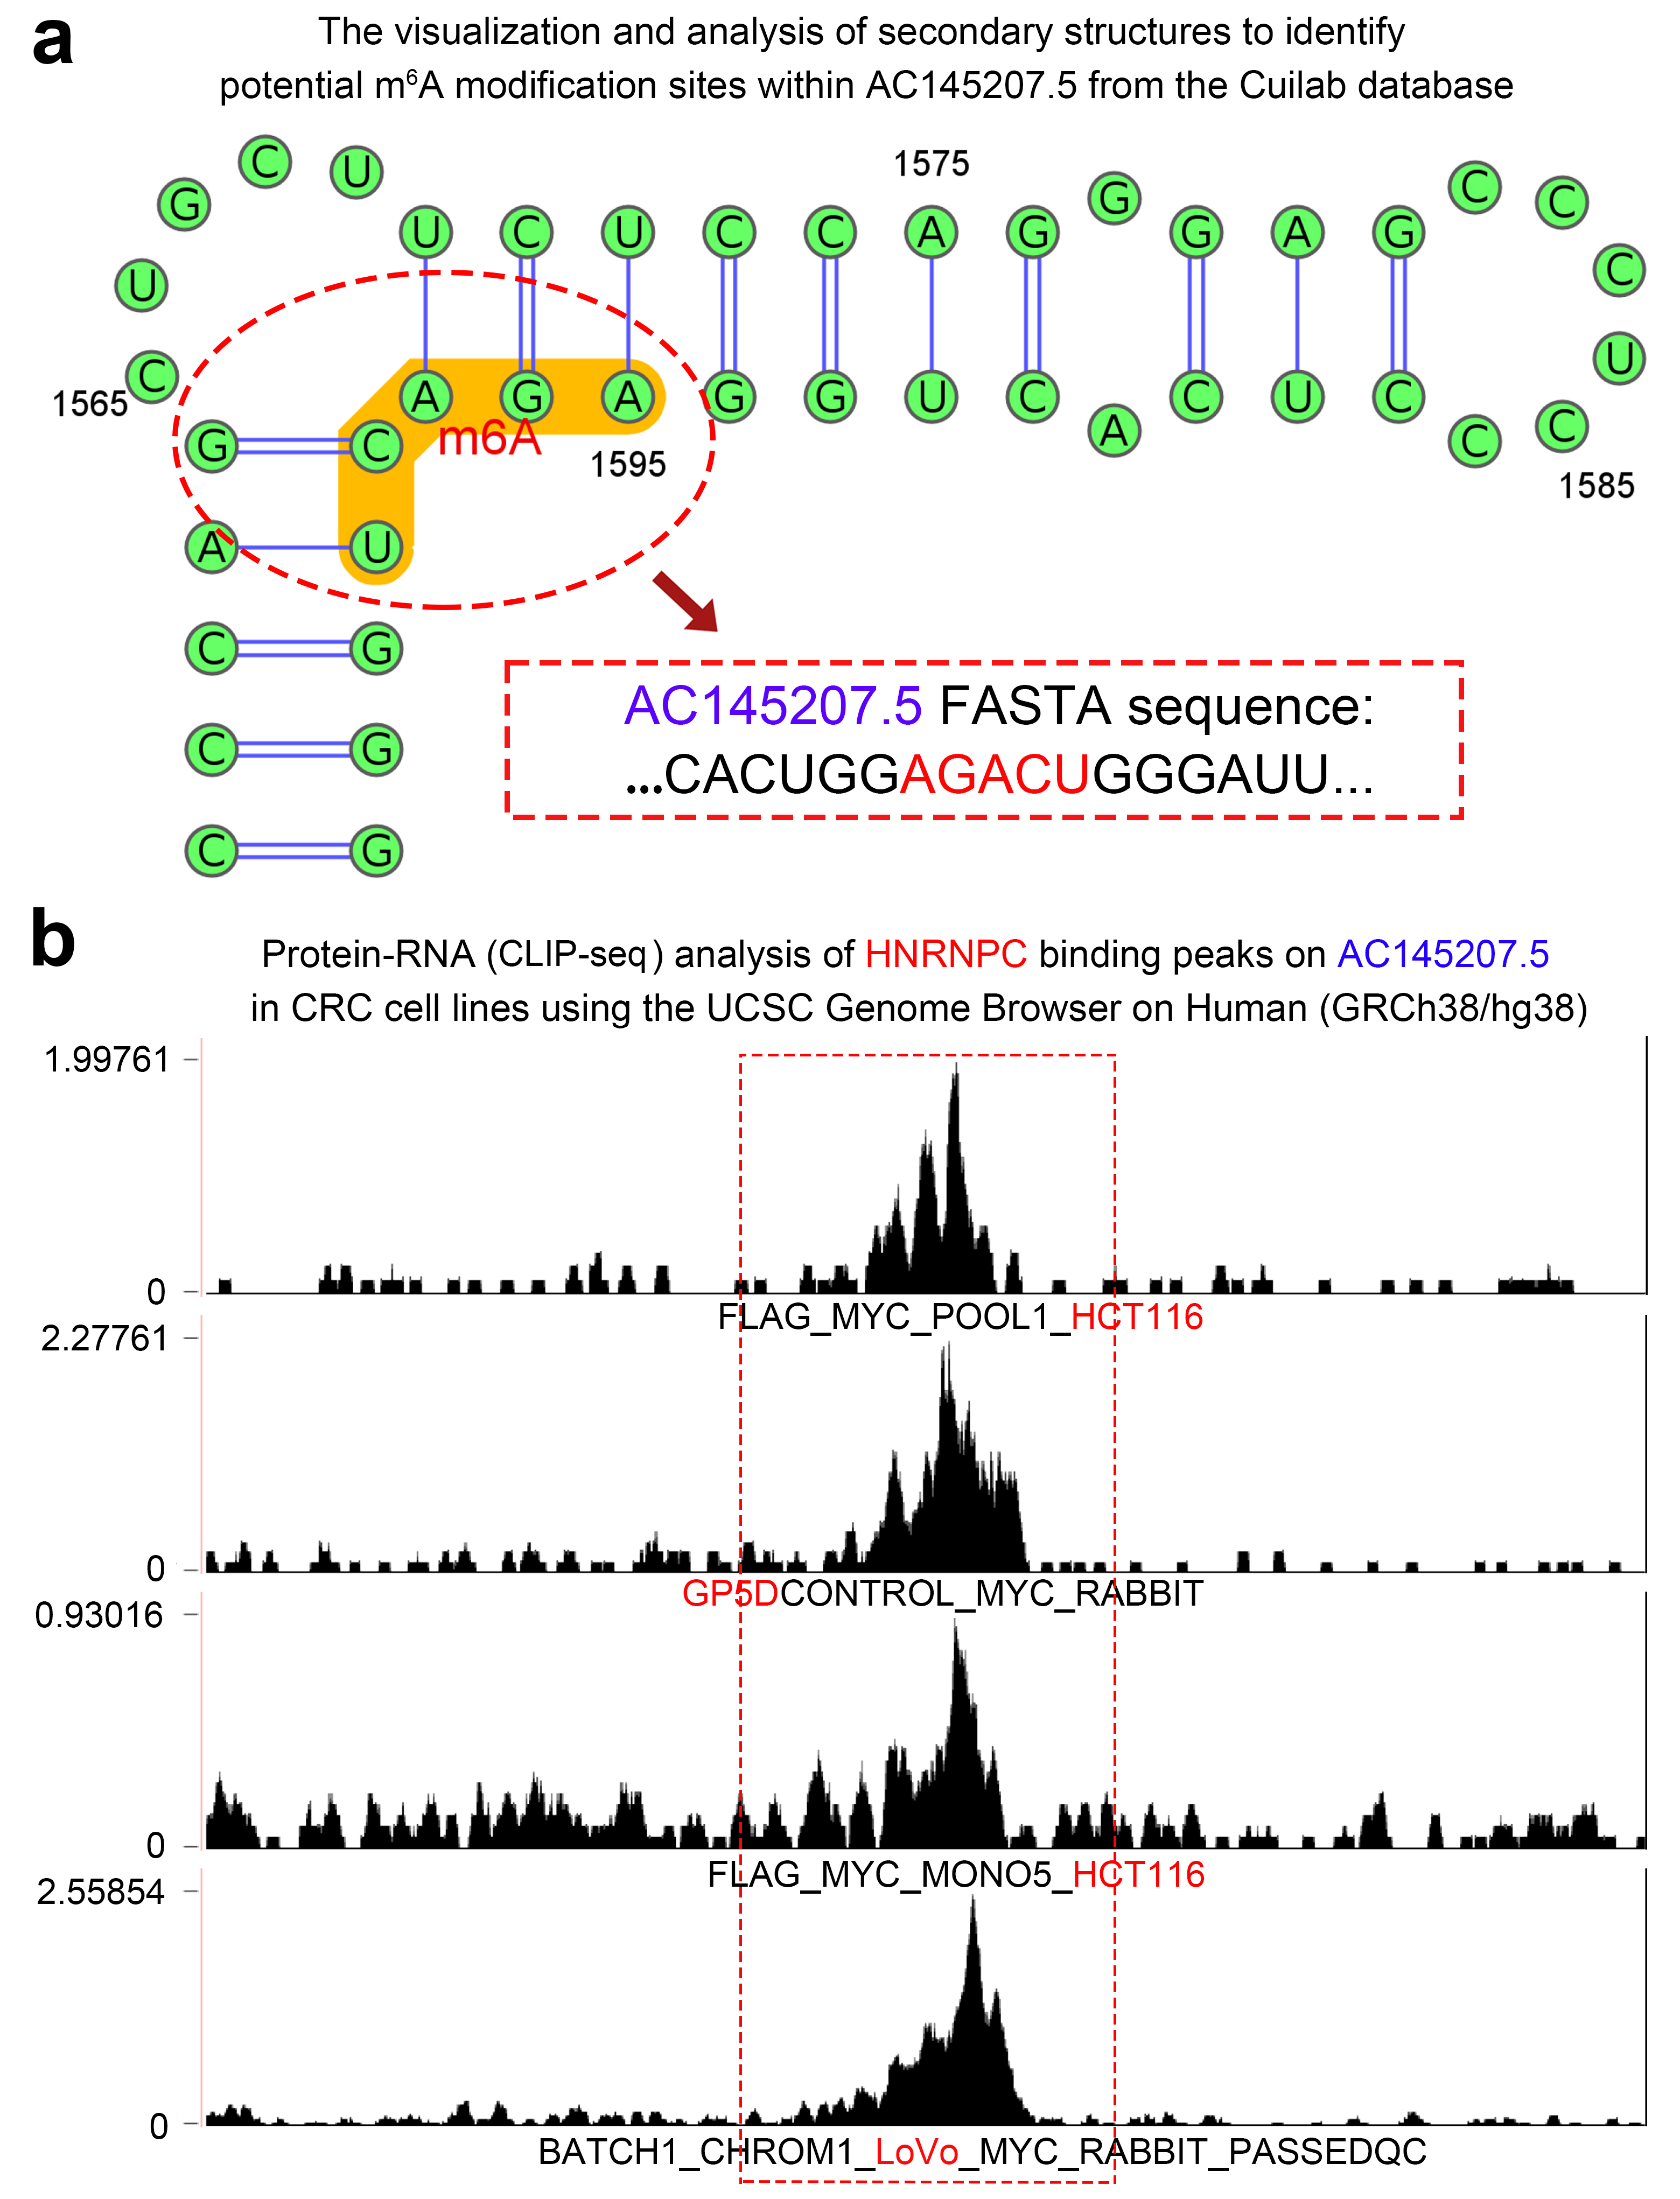


**Fig.S2 The RNA-binding protein HNRNPC interacts with AC145207.5 via the m6A modification site, related to Fig.1.** (**a**)Secondary structure analysis of AC145207.5 from the Cuilab database to identify putative m6A modification sites. (**b**)Protein-RNA (CLIP-seq) analysis illustrates HNRNPC binding peaks on AC145207.5 in CRC cell lines, as determined using the UCSC Genome Browser on Human (GRCh38/hg38).


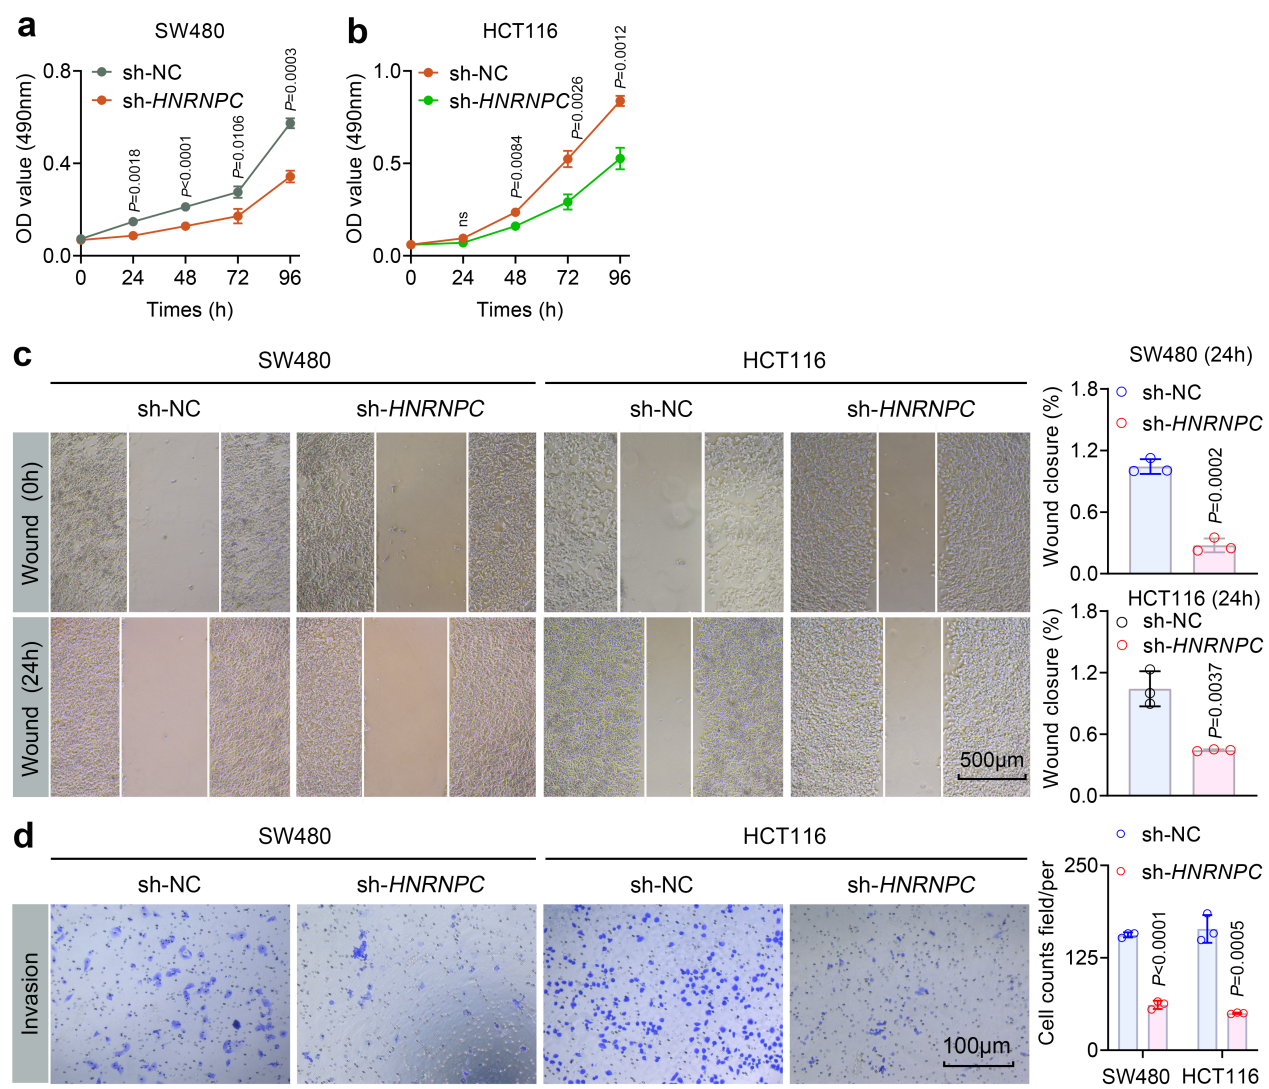


**Fig.S3 *HNRNPC* knockdown impairs the proliferation and invasion of CRC cells *in vitro*, related to Fig.3.** (**a and b**) MTS assay demonstrating the impact of *HNRNPC* knockdown on cell viability in SW480 and HCT116 cell lines. Statistical analyses were performed using the Two-way ANOVA-test. (**c**) Wound healing assays were employed to assess the impact of *HNRNPC* knockdown on the horizontal migration capabilities of SW480 and HCT116 cells. Statistical analyses were performed using the Student’s t-test. (**d**) Transwell assays were employed to assess the impact of *HNRNPC* knockdown on the invasive capabilities of SW480 and HCT116 cells. Statistical analyses were performed using the Student’s t-test. Each bar represents the mean values ± SD.

**Supplementary Table 1. The sequence of primers used in RT-qPCR analysis.**

| **Gene name** | **Forward primer (5’-3’)** | **Reverse primer (5’-3’)** |
| --- | --- | --- |
| AC145207.5 | 5′-TTAATTTCAGCATCCACTGGTG-3′ | 5′-GAAGGGACTGCTCTTTCTTAGAGA-3′ |
| *HNRNPC* | 5′-GGCTTTGTGAGAAACCTTACCAT-3′ | 5′-TTCATGGAGCGAGGATCTGTC-3′ |
| *IGF2BP2* | 5′-CAGATGAGACCAAACTAGCCGAA-3′ | 5′-TCAGTCTTCCAACCAAGCCATT-3′ |
| *ELAVL1* | 5′-ACAGCTTGGGCTATGGCTTT-3′ | 5′-TTCAGCGTGTTGATCGCTCT-3′ |
| *FMR1* | 5′-ATACCTCCAGTGAAGGTAGTCGG-3′ | 5′-GGTACTCCATTCACGAGTGGTTG-3′ |
| *GPX4* | 5′-TTCCCGTGTAACCAGTTCGG-3′ | 5′-GTGGAGAGACGGTGTCCAAA-3′ |
| *GAPDH* | 5′-GGAAATCCCATCACCATCTTC-3′ | 5′-TGGACTCCACGACGTACTCAG-3′ |

**Supplementary Table 2. The targeted sequences of siRNAs and shRNAs.**

| **Gene names** | **Targeted sequences (5′-3′)** |
| --- | --- |
| sh-AC145207.5#1 | 5′-CCCTTTGTCATCCATAAAT-3′ |
| sh-AC145207.5#2 | 5′-TCTGTTTCACTTCCAAGTT-3′ |
| sh-AC145207.5#3 | 5′-GACCTACGATTTCTTTCTT-3′ |
| sh-*HNRNPC#*1 | 5′-CAGCAACGUUGCCGACAAGA-3′ |
| sh-*HNRNPC#*2 | 5′-GCUCCAGAAAUCUGAUGUGG-3′ |
| sh-*IGF2BP2*#1 | 5′-CATGCCGCATGATTCTTGA-3′ |
| sh-*IGF2BP2*#2 | 5′-CATATAGGTGACGTTGACAA |
| sh-*ELAVL1*#1 | 5′-GACCCAGGATGAGTTACGA-3′ |
| sh-*ELAVL1*#2 | 5′-GACGCCAACTTGTACATCAG-3′ |
| sh-*FMR1*#1 | 5′-GCAGCCTGATAGGCAGATT-3′ |
| sh-*FMR1*#2 | 5′-ATGCGGTTAACACGTTTCTG-3′ |
| si-*GPX4*#1 | 5′-GCTACAACGTCAAATTCGA-3′ |
| si-*GPX4*#2 | 5′-TTTCCGCCAAGGACATCGAC-3′ |
