# Supplementary figures and images for: HNRNPC stabilizes m6A-modified AC145207.5 to accelerate tumorigenesis in colorectal cancer by impeding the Nrf2/GPX4 axis-mediated ferroptosis
Source: Research Square preprint supplement (doi:10.21203/rs.3.rs-5676492/v1), 2024-12-23

**Fig.1h-Western blot**


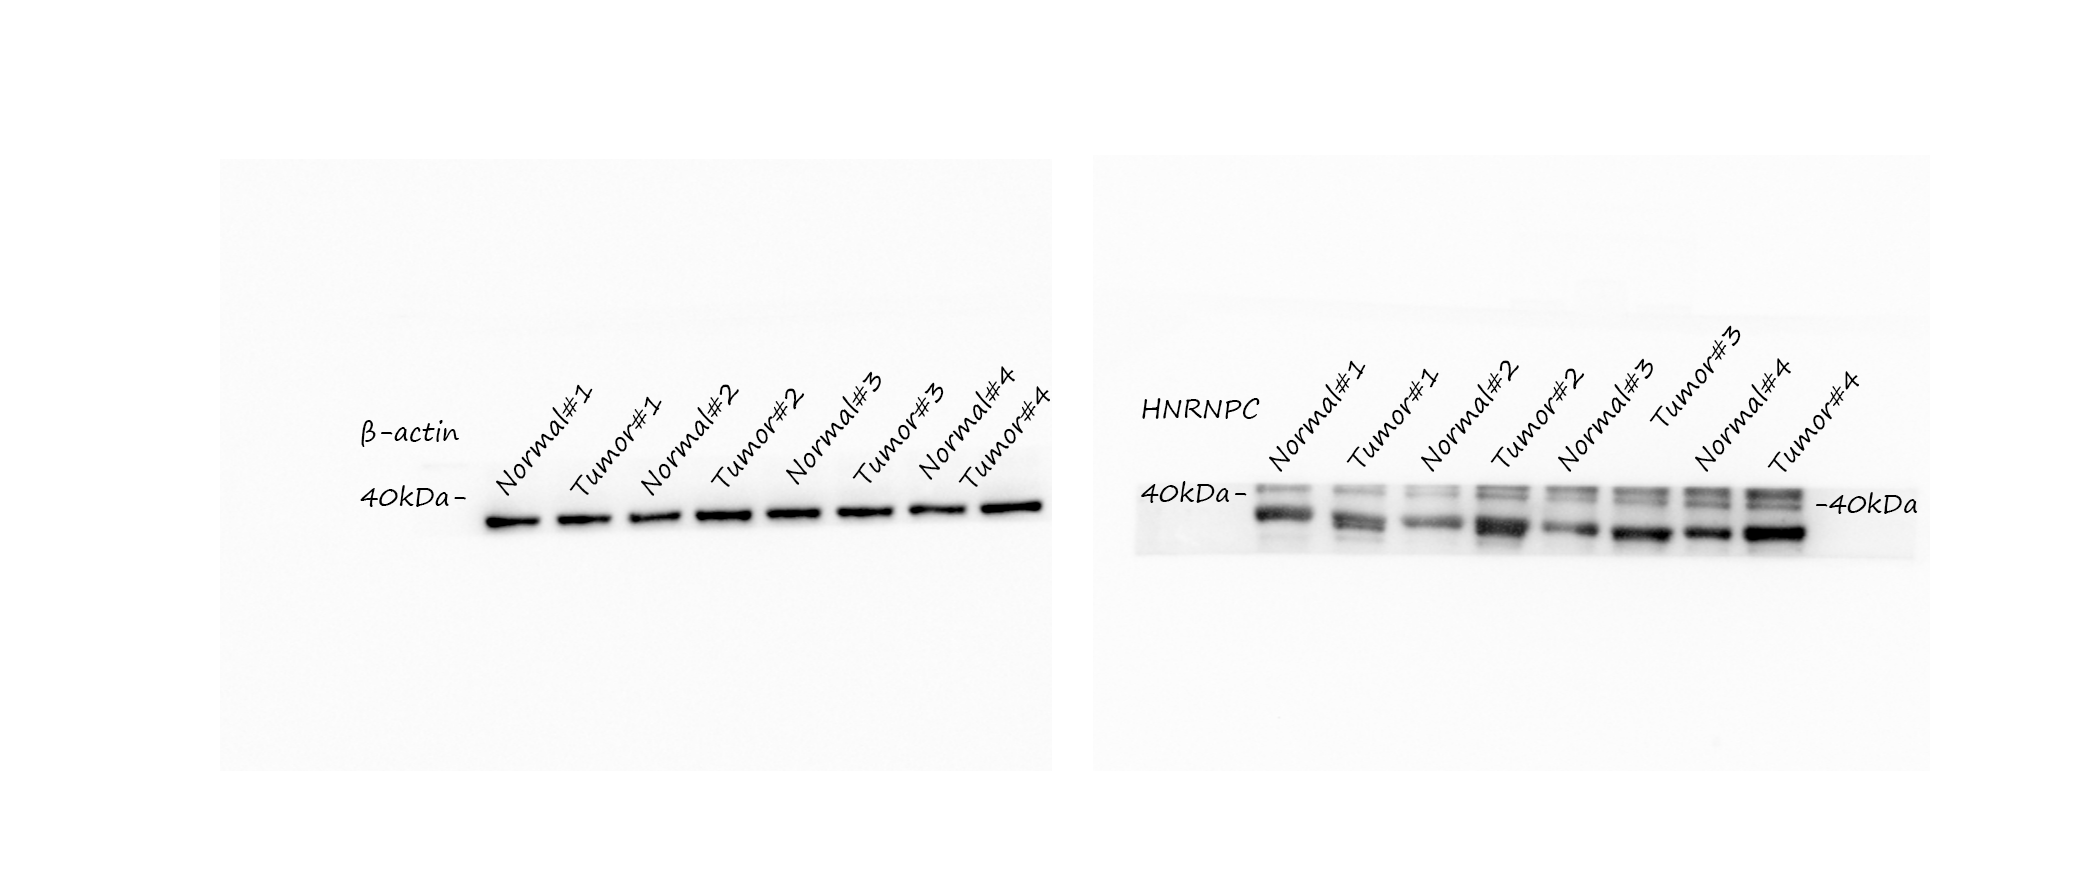


**Fig.5c-Western blot**

**
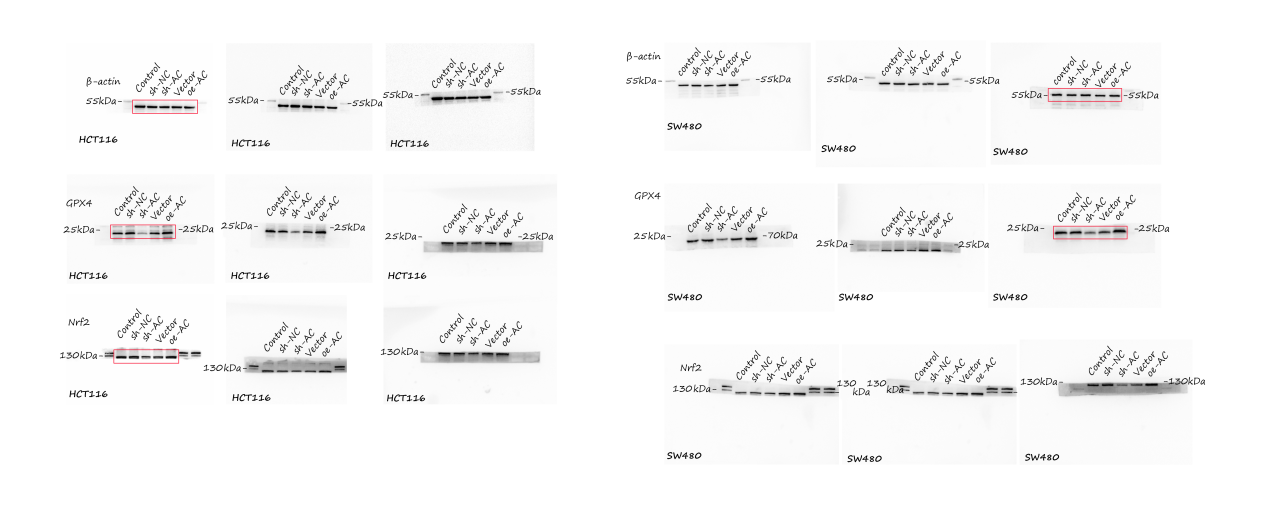
**

**Fig.5d-Western blot**

**
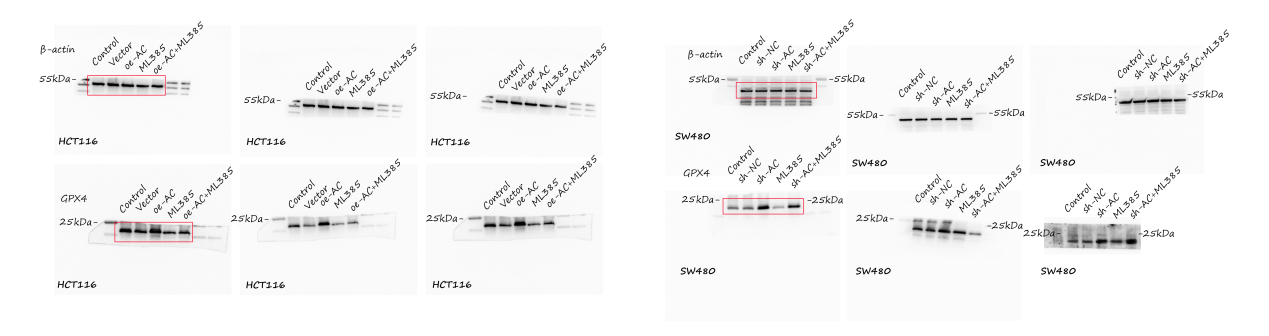
**

**Fig.5e-Western blot**

**
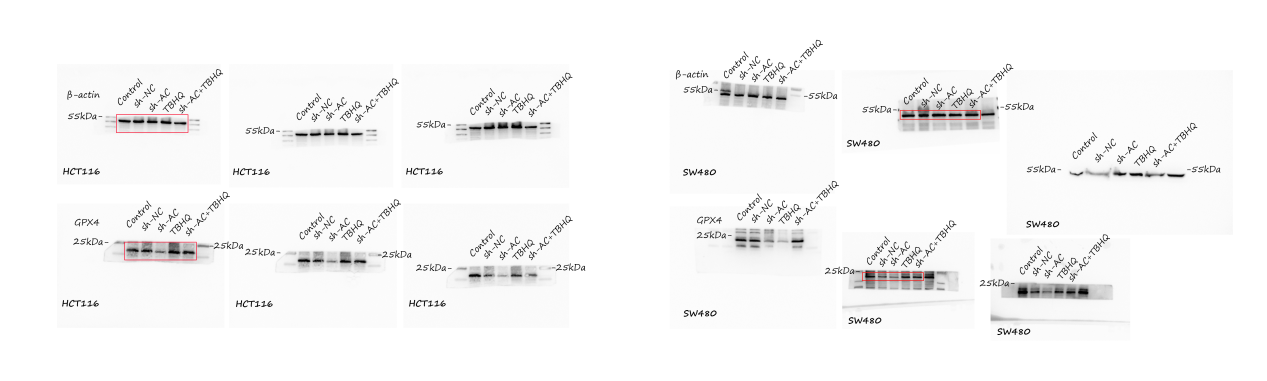
**

Supplement: Supplementary file 1 [file 0e7a89a9a008e400844dc5a8.docx]
